# Supplementary material
Source: Springer Nature journal article supplement (https://www.springermedizin.de/resource/supplementary/12874_2006_188_MOESM2_ESM.pdf/9434052)

# ANTIBIOTICS (Rheumatic Fever)

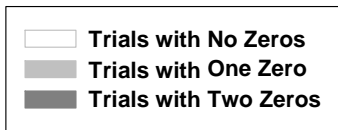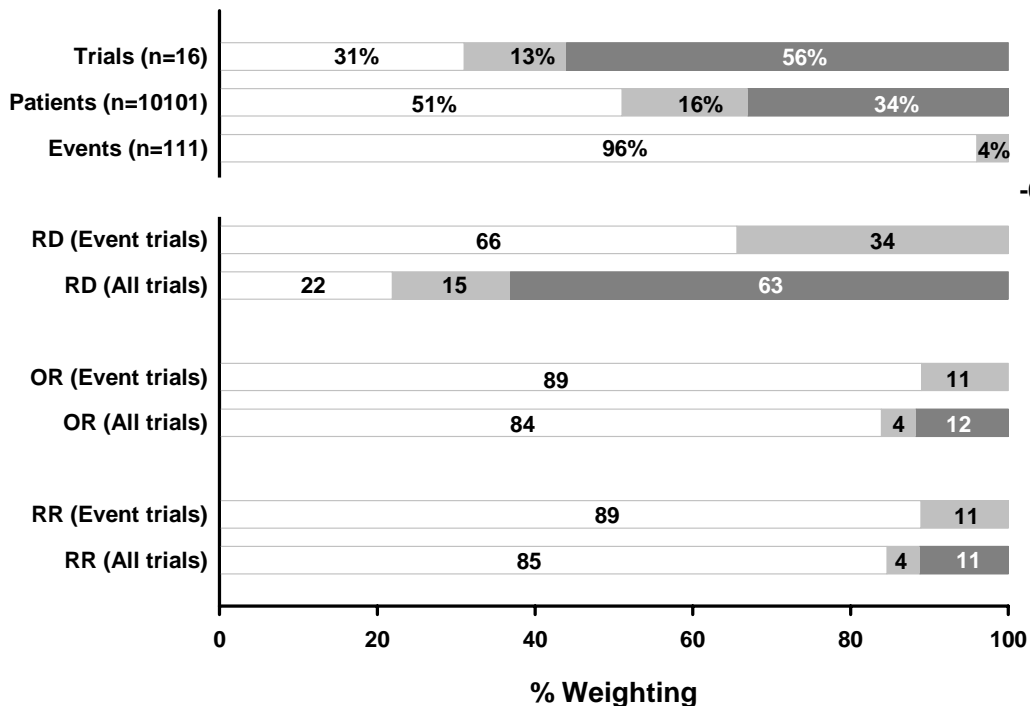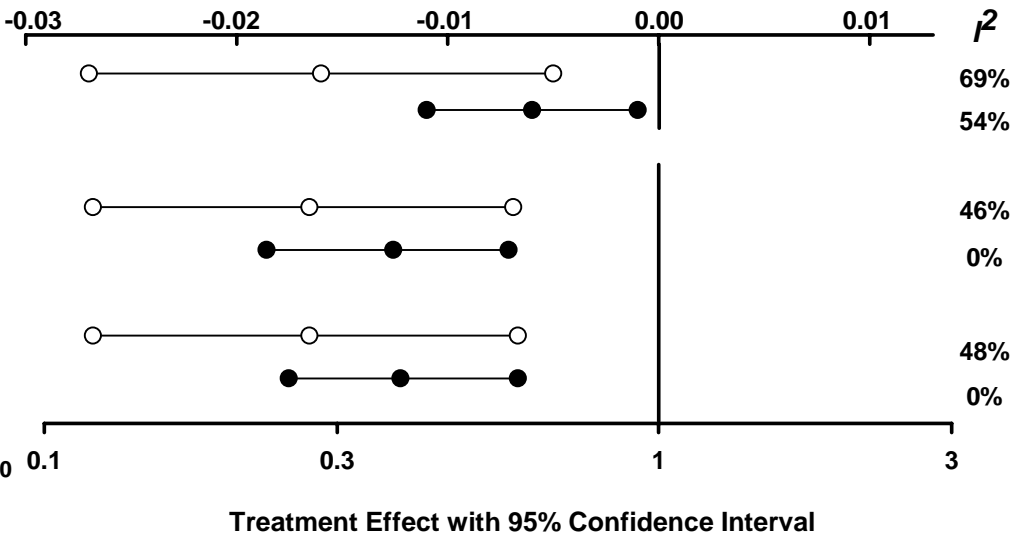

Supplement: MOESM2 [file 9434052]
